# Supplementary material for: Diagnostic value of quantitative chemiluminescence immunoassay for anti-gp210 and anti-sp100 antibodies in primary biliary cholangitis
Source: publisher site journal article supplement (doi:10.1515/cclm-2023-1490), 2024-03-05
Supplement: Supplementary file 1 [file j_cclm-2023-1490_suppl_001.docx]

**Supplementary Material**

Table S1 General characteristics of patients with PBC by antibodies status.

|  | AMA/AMA-M2, anti-gp210 and anti-sp100 | | *p*-value |
| --- | --- | --- | --- |
| All negative  (n=32) | One or more positive  (n=133) |
| Age (years) | 58.50 (52.25, 65.75) | 56.00 (52.00, 63.50) | 0.454 |
| Female, n (%) | 30 (93.75) | 115 (86.47) | 0.370 |
| ALT(U/L) | 31.50 (21.00, 43.00) | 31.00 (20.00, 48.00) | 0.670 |
| AST(U/L) | 40.50 (31.75, 61.50) | 43.00 (29.00, 72.50) | 0.670 |
| GGT(U/L) | 59.50 (22.00, 105.75) | 94.00 (37.00, 196.00) | **0.019** |
| ALP(U/L) | 125.50 (94.25, 224.25) | 169.00 (115.50, 261.00) | 0.054 |
| TBIL (μmol/L) | 16.52 (12.96, 33.00) | 16.24 (11.63, 25.88) | 0.486 |
| DBIL (μmol/L) | 6.95 (4.90, 13.90) | 6.88 (5.25, 13.38) | 0.887 |
| ALB (g/L) | 40.40 (32.25, 42.75) | 36.60 (30.15, 42.15) | 0.179 |
| IgA (g/L) | 3.04 (2.04, 3.98) | 3.20 (2.12, 4.16) | 0.781 |
| IgM (g/L) | 1.58 (1.34, 2.77) | 2.54 (1.54, 4.37) | **0.015** |
| IgG (g/L) | 15.75 (12.93, 17.65) | 14.00 (12.12, 17.90) | 0.315 |

Abbreviations: PBC, primary biliary cholangitis; AMA, antimitochondrial antibody; ALT, alanine aminotransferase; AST, aspartate aminotransferase; GGT, gamma-glutamyl transpeptidase; ALP, alkaline phosphatase; TBIL, total bilirubin; DBIL, direct bilirubin; ALB, albumin; IgA, immunoglobulin A; IgM, immunoglobulin M; IgG, immunoglobulin G. Data are expressed as median (quartile 25, quartile 75) or number (proportion). *p* < 0.05 was considered significant.
